# Supplementary material
Source: HighWire-hosted journal article supplement (https://bmjopen.bmj.com/content/9/3/e023192)
Supplement: inline-supplementary-material-1 [file inline-supplementary-material-1.pdf]

**Appendix 1. Overview of main UK and Scottish daily and Sunday newspapers selected by publication location, genre, circulation, readership and political ideology, October 205 – September 2016. (From: National Readership Survey, [http://www.nrs.co.uk/downloads/pdf/newspapers\\_201611.pdf](http://www.nrs.co.uk/downloads/pdf/newspapers_201611.pdf))**

| <b>Newspaper</b>     | <b>Estimated weekly readership (Number)</b> | <b>% Readership Female</b> | <b>% Readership in Social Group C2DE</b> | <b>% Readership Aged 35 +</b> | <b>Political Ideology</b> |
|----------------------|---------------------------------------------|----------------------------|------------------------------------------|-------------------------------|---------------------------|
| <b>UK</b>            |                                             |                            |                                          |                               |                           |
| <b>Quality</b>       |                                             |                            |                                          |                               |                           |
| Daily Telegraph      | 1,183,000                                   | 47.4                       | 17.8                                     | 89.6                          | Right                     |
| The Sunday Telegraph | 1,113,000                                   | 46.9                       | 15.5                                     | 89.2                          | Right                     |
| The Times            | 1,047,000                                   | 44.6                       | 15.2                                     | 83.8                          | Centre-right              |
| The Sunday Times     | 1,834,000                                   | 47.0                       | 15.4                                     | 83.9                          | Centre-right              |
| The Guardian         | 865,000                                     | 48.4                       | 20.1                                     | 73.9                          | Centre-left               |
| The Observer         | 764,000                                     | 45.8                       | 13.2                                     | 80.9                          | Centre-left               |
| <b>Middle-Market</b> |                                             |                            |                                          |                               |                           |
| Daily Mail           | 3,354,000                                   | 53.9                       | 38.0                                     | 87.7                          | Right                     |
| The Mail on Sunday   | 3,608,000                                   | 51.5                       | 39.2                                     | 87.0                          | Right                     |
| Daily Express        | 842,000                                     | 48.8                       | 43.6                                     | 91.8                          | Right                     |
| Sunday Express       | 826,000                                     | 47.5                       | 40.4                                     | 88.0                          | Right                     |
| <b>Tabloid</b>       |                                             |                            |                                          |                               |                           |
| The Sun*             | 4,188,000                                   | 42.7                       | 68.3                                     | 75.5                          | Right                     |
| The Sun on Sunday*   | 3,640,000                                   | 44.6                       | 65.3                                     | 72.4                          | Right                     |
| Daily Mirror         | 1,818,000                                   | 46.1                       | 65.0                                     | 83.7                          | Left                      |
| Sunday Mirror        | 1,804,000                                   | 49.8                       | 61.5                                     | 79.0                          | Left                      |
| Daily Star           | 800,000                                     | 34.5                       | 75.1                                     | 74.8                          | Neutral                   |
| Daily Star Sunday    | 584,000                                     | 40.8                       | 74.5                                     | 71.2                          | Neutral                   |

|                    |         |      |      |      |         |
|--------------------|---------|------|------|------|---------|
|                    |         |      |      |      |         |
| <b>Scotland</b>    |         |      |      |      |         |
| <b>Quality</b>     |         |      |      |      |         |
| The Herald         | 109,000 | 33.0 | 26.6 | 87.2 | Neutral |
| Sunday Herald      | 109,000 | 46.8 | 30.3 | 73.4 | Neutral |
| The Scotsman       | 73,000  | 42.5 | 21.9 | 87.7 | Neutral |
| Scotland on Sunday | 72,000  | 51.4 | 18.1 | 84.7 | Neutral |
|                    |         |      |      |      |         |
| <b>Tabloid</b>     |         |      |      |      |         |
| Daily Record       | 484,000 | 48.3 | 69.4 | 89.1 | Left    |
| Sunday Mail        | 558,000 | 50.7 | 67.0 | 89.1 | Left    |

\*Not included in this analysis, as The Sun is not included in the Nexis database; included here for comparison.
